# Supplementary material for: Epinephrine promotes breast cancer metastasis through a ubiquitin-specific peptidase 22–mediated lipolysis circuit
Source: PubMed Central journal article supplement — Sci Adv. 2024 Aug 16;10(33):eado1533. doi: 10.1126/sciadv.ado1533 (PMC11328899; doi:10.1126/sciadv.ado1533), 2024-08-16
Supplement: sciadv.ado1533_sm.pdf [file sciadv.ado1533_sm.pdf]

Supplementary Materials for  
**Epinephrine promotes breast cancer metastasis through a ubiquitin-specific  
peptidase 22–mediated lipolysis circuit**

Yuanzhang Zhou *et al.*

Corresponding author: Hongjiang Wang, [hjwang@dmu.edu.cn](mailto:hjwang@dmu.edu.cn); Zhaolin Sun, [zlsun56@yeah.net](mailto:zlsun56@yeah.net);  
Deyu Fang, [fangd@northwestern.edu](mailto:fangd@northwestern.edu)

*Sci. Adv.* **10**, eado1533 (2024)  
DOI: 10.1126/sciadv.ado1533

**This PDF file includes:**

Figs. S1 to S16  
Tables S1 to S6

**Figure s1**

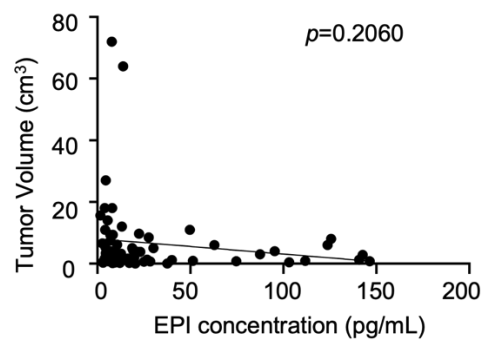

**Fig. s1:** Statistical analysis to determine the correlation between serum Epi levels and tumor volume. (n = 65). Pearson correlation coefficient was used as a measure of association.

**Figure s2**

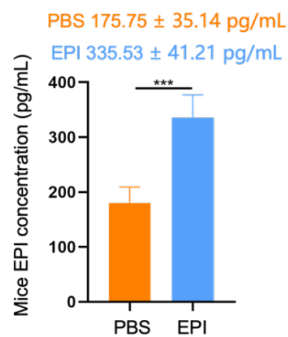

**Fig. s2.** Analysis of the serum EPI concentrations in mice treated with the EPI and the PBS (N = 10 each group). Data are expressed as mean ± SD. Statistical significance was determined by unpaired Student's *t* test. Statistical significance was concluded at \*\*\* $P < 0.001$ .

**Figure s3**

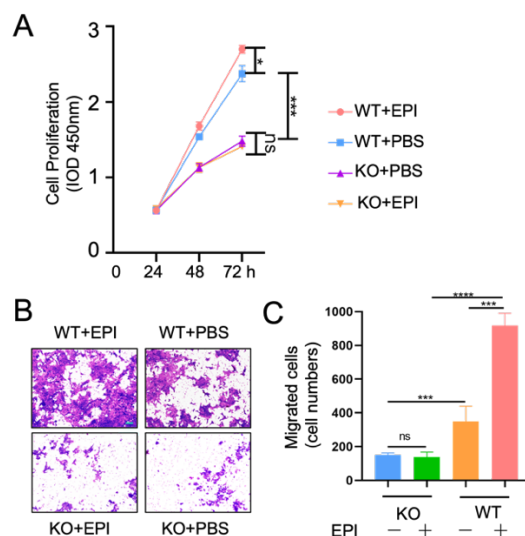

**Fig. s3.** Analysis of the effects of EPI on 4T1 cell growth and migration. (A) The effect of *USP22* knock out on the 4T1 cell proliferation in the presence of Epi or not were determined by the WST-8

reagent (n = 3). (B & C) Transwell assays were conducted to assess the migratory capacity of the indicated types of 4T1 cells (n = 3). Representative images are shown in (B), scar bar: 100 $\mu$ m, and migrated cells were counted from five random fields (C). Statistical significance was determined by unpaired Student's *t* test or one-way ANOVA test. Data are expressed as mean  $\pm$  SD of three independent experiments. Statistical significance was concluded at \**P* < 0.05, \*\**P* < 0.01, \*\*\**P* < 0.001; ns represents no statistical significance.

**Figure s4**

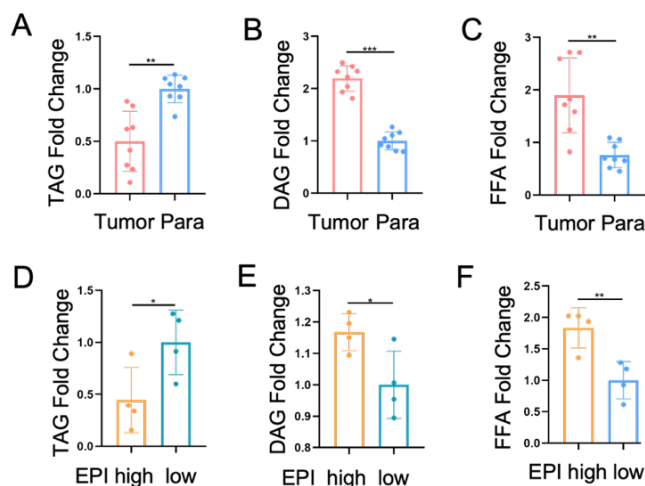

**Fig. s4: Analysis of the lipid components in tumor and para-tumor tissues.** (A-C) Relative levels of TAG (A), DAG (B), FFA (C) in 8 pairs of breast cancer and matched non-tumorous tissues (fold change of mean value of non-tumorous group) (para-tumor, n = 8; tumor, n = 8). (D-F) Relative levels of TAG (D), DAG (E), FFA (F) in 8 breast cancer tissues as indicated group (fold change of mean value of Epi<sup>low</sup> group) (Epi<sup>high</sup>, n = 4; Epi<sup>low</sup>, n = 4). Data are expressed as mean  $\pm$  SD. Statistical significance was determined by unpaired Student's *t* test. Statistical significance was concluded at \**P* < 0.05, \*\**P* < 0.01. \*\*\**P* < 0.001; ns represents no statistical significance.

**Figure s5**

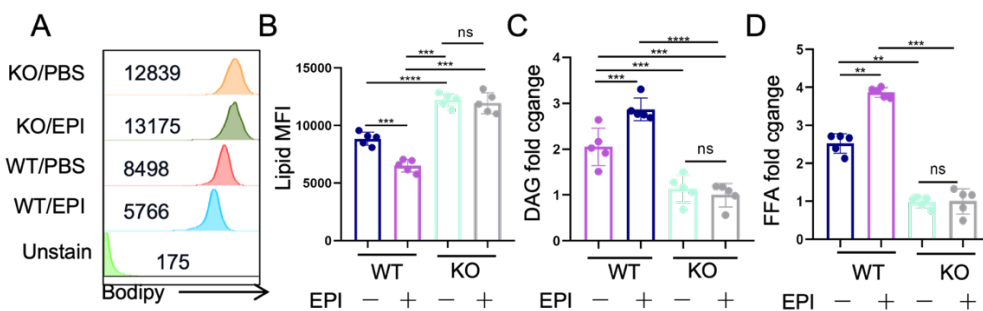

**Fig. s5. The effect of EPI on 4T1 cell lipolysis.** (A-D) Intracellular lipid analysis in WT and USP22-null 4T-1 cells isolated from the xenograft tumors as shown in Fig. 2Q, including bodipy (A & B), DAG (C) and FFA (D). Data are expressed as mean  $\pm$  SD of five independent experiments. Statistical significance was determined by one-way ANOVA test or unpaired Student's *t* test. Statistical significance was concluded at \**P* < 0.05, \*\**P* < 0.01. \*\*\**P* < 0.001; ns represents no statistical significance.

**Figure s6**

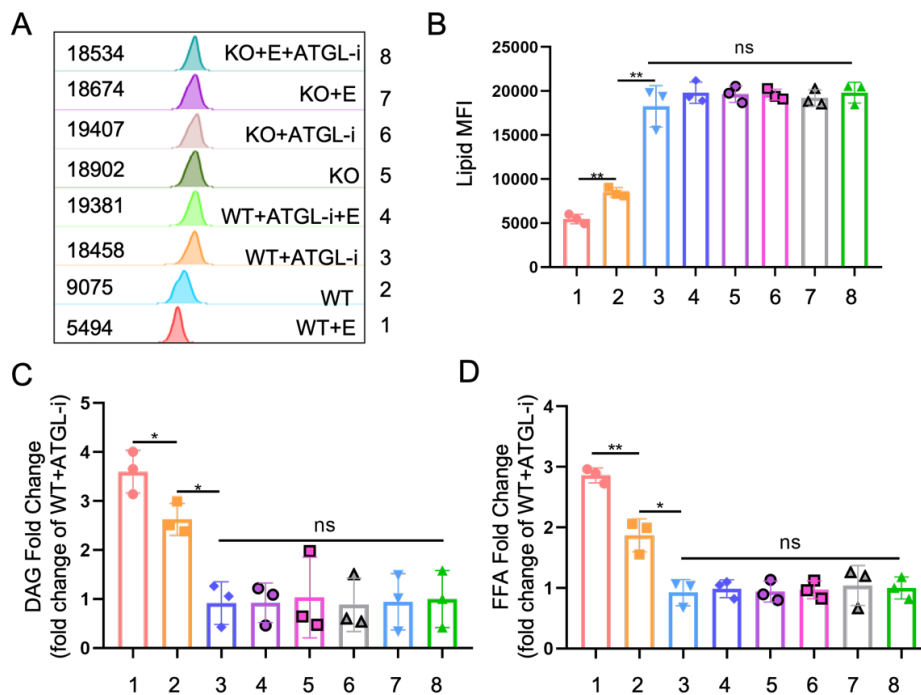

**Fig. s6. The effect of ATGL inhibitor on EPI-induced lipolysis.** WT and USP22 KO 4T1 cells were treated with EPI or further with ATGL specific inhibitor Atglitatin (50  $\mu$ M) for 24 hours. **(A & B)** The bodipy staining and **(C & D)** the levels of DAG (C) and FFA (D) were analyzed (N=3). Statistical significance was determined by one-way ANOVA test or unpaired Student's *t* test. Data are expressed as mean $\pm$ SD of three independent experiments. Statistical significance was concluded at \**P* < 0.05, \*\**P* < 0.01, \*\*\**P* < 0.001; ns: no statistical significance.

**Figure s7**

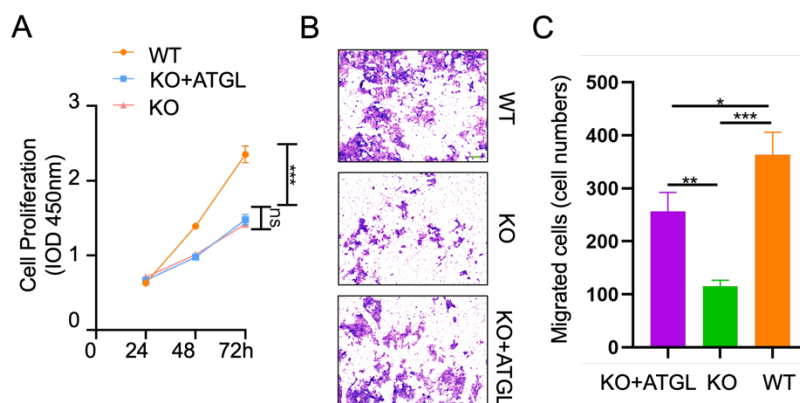

**Fig. s7. Analysis of the effects of ATGL expression on USP22-null 4T1 cell growth and migration.** **(A)** The effect of overexpression of *ATGL* in the knockout on the 4T1 cell proliferation were determined by the WST-8 reagent. **(B-C)** Transwell assays were performed to evaluate the migratory capacity of the indicated types of 4T1 cells (n = 3). Representative images are presented in (B), scar bar: 100 $\mu$ m, and the number of migrated cells was quantified from five random fields (C). Statistical significance was determined by unpaired Student's *t* test or one-way ANOVA test. Data are expressed as mean  $\pm$  SD of three independent experiments. Statistical significance was concluded at \**P* < 0.05,

**\*\* $P < 0.01$ , \*\*\* $P < 0.001$ ; ns: no statistical significance.**

**Figure s8**

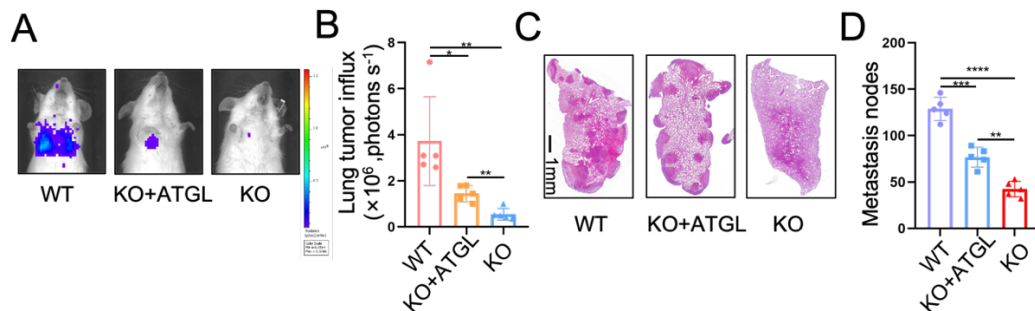

**Fig. s8: Analysis of the effects of ATGL expression on USP22-null 4T1 tumor metastasis. (A-D)** A total of  $0.5 \times 10^5$  WT, USP22-KO + ATGL 4T1 cells or USP22-KO 4T1 cells transduced with ATGL were injected via the tail vein into BALB/C mice. Lung metastases were measured by luminol fluorescence (A & B) and H & E staining (C & D). Statistical significance was determined by unpaired Student's  $t$  test or one-way ANOVA test. Data are expressed as mean  $\pm$  SD of five independent experiments. Statistical significance was concluded at  $*P < 0.05$ ,  $**P < 0.01$ ,  $***P < 0.001$ ; ns: no statistical significance.

**Figure s9**

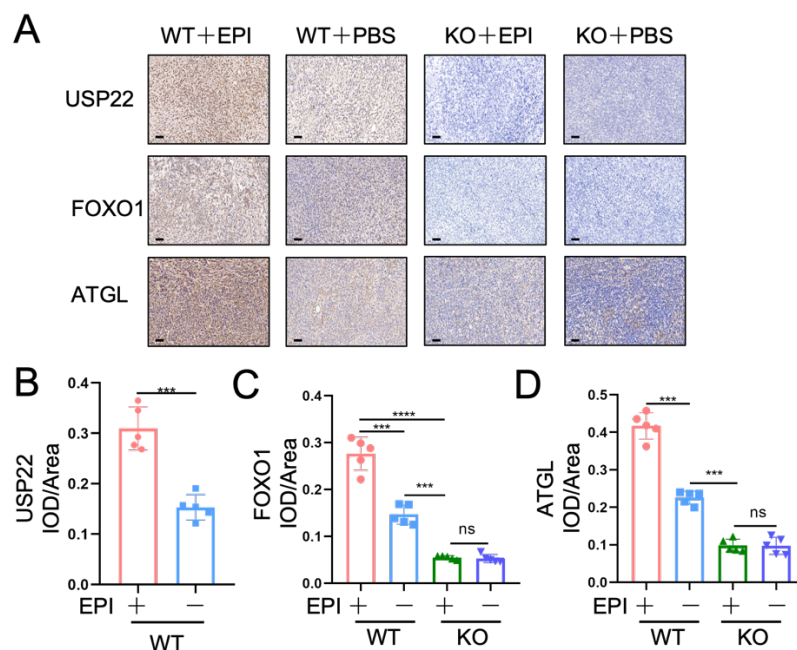

**Fig. s9.** Analysis of USP22, FOXO1 and ATGL expression levels by immunohistochemistry in syngeneic tumor tissues as shown in Fig. 2Q. Representative images (A), scale bar: 50  $\mu$ m and quantification data (B-D) are shown. Statistical significance was determined by one-way ANOVA test or unpaired Student's  $t$  test. Data are expressed as mean  $\pm$  SD of five independent experiments. Statistical significance was concluded at  $*P < 0.05$ ,  $**P < 0.01$ ,  $***P < 0.001$ ; ns: no statistical significance.

**Figure s10**

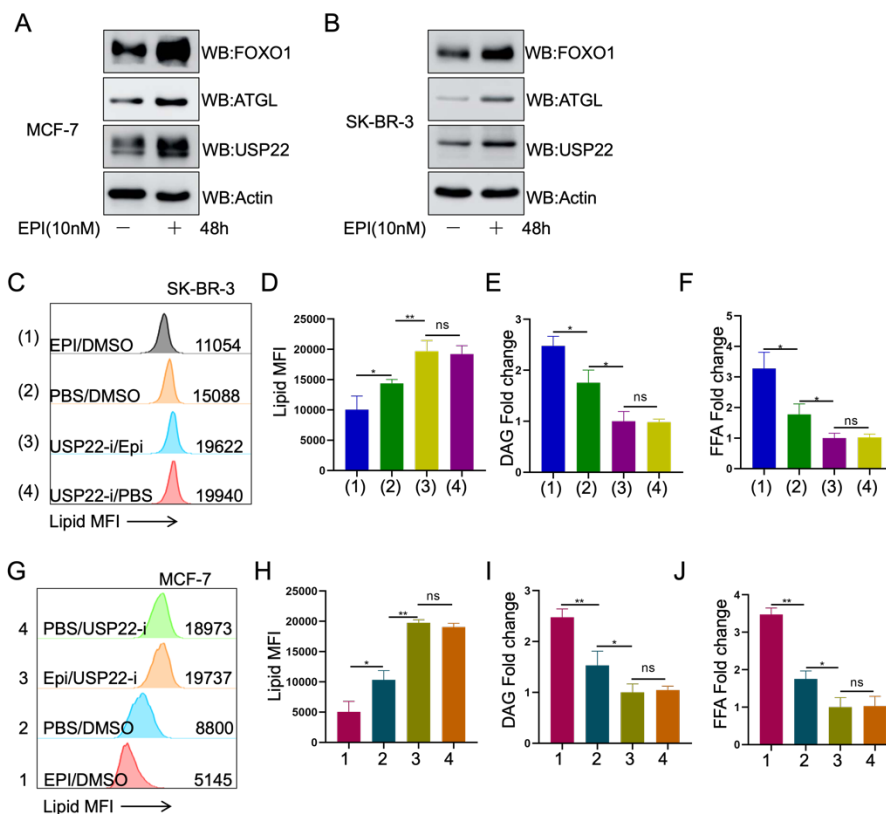

**Fig. 10. Analysis of EPI-induced USP22 and lipolysis in MCF-7 and SK-BR-3 cells. (A & B)** Analysis of USP22, ATGL, FOXO1 protein expression in MCF-7 cells (A) and SK-BR-3 cells (B) after treated with Epi for 48h. (C-J) Intracellular lipid analysis, including bodipy, DAG and FFA in indicated types of SK-BR-3 cells (C-F) or MCF-7 cells (G-J). (n = 3). Statistical significance was determined by one-way ANOVA test or unpaired Student's *t* test. Data are expressed as mean  $\pm$  SD of three independent experiments. Statistical significance was concluded at \**P* < 0.05, \*\**P* < 0.01, \*\*\**P* < 0.001; ns: no statistical significance.

**Figure s11**

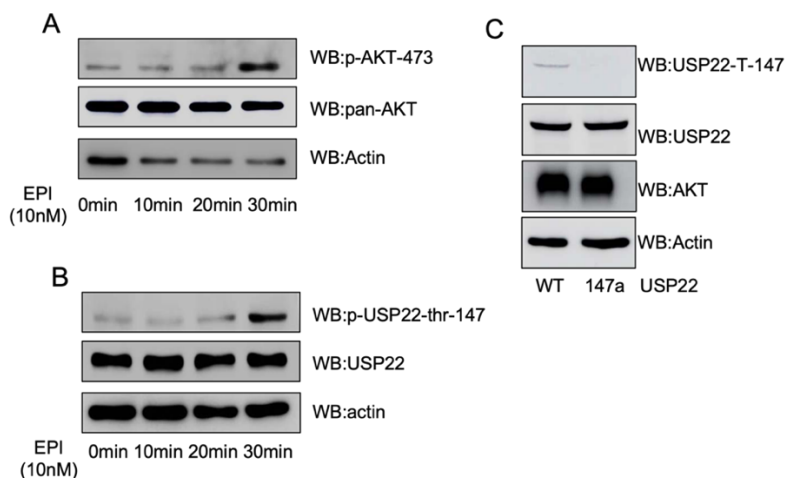

**Fig. s11. Analysis of EPI-induced AKT phosphorylation. (A)** Immunoblot analysis of p-AKT-473 protein expression in MDA-MB-231 cells treated with EPI or PBS for indicated times. (B).

Immunoblot analysis of p-USP22-thr-147 protein expression in MDA-MB-231 cells treated with EPI or PBS for indicated times. **(C)** WT or USP22/T147A mutants with or without AKT were transfected to USP22 KO 4T1 cells. USP22 phosphorylation was determined by immunoblotting with anti-p-147-USP22 Ab (top panel). The expression levels of total USP22 (middle panel) and AKT (bottom panel) were confirmed.

**Figure s12**

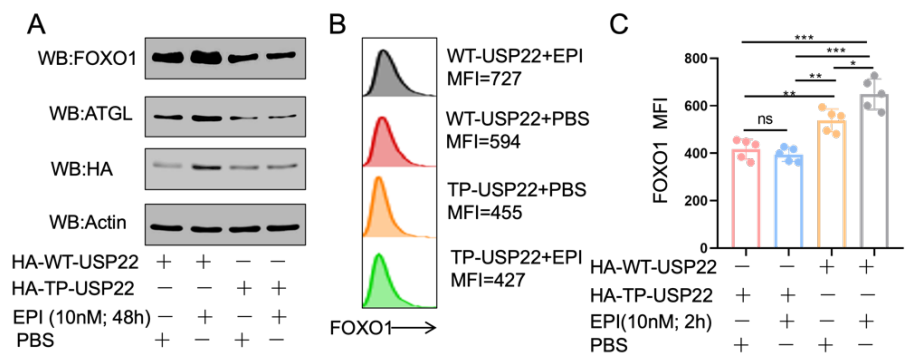

**Fig. s12. The effect of USP22 phosphorylation on lipolysis in 4T1 cells.** **(A)** Analysis of USP22, FOXO1, ATGL protein expression in USP22-KO MDA-MB-231 cells transfected with the WT-USP22 plasmid or the TP-USP22 plasmid and treated with Epi or PBS. **(B-C)** The effect of EPI on FOXO1 protein expression in USP22-KO MDA-MB-231 cells transfected with the WT-USP22 plasmid or the TP-USP22 plasmid. Statistical significance was determined by one-way ANOVA test or unpaired Student's *t* test. Data are expressed as mean  $\pm$  SD of five independent experiments. Statistical significance was concluded at \* $P < 0.05$ , \*\* $P < 0.01$ , \*\*\* $P < 0.001$ ; ns: no statistical significance.

**Figure s13**

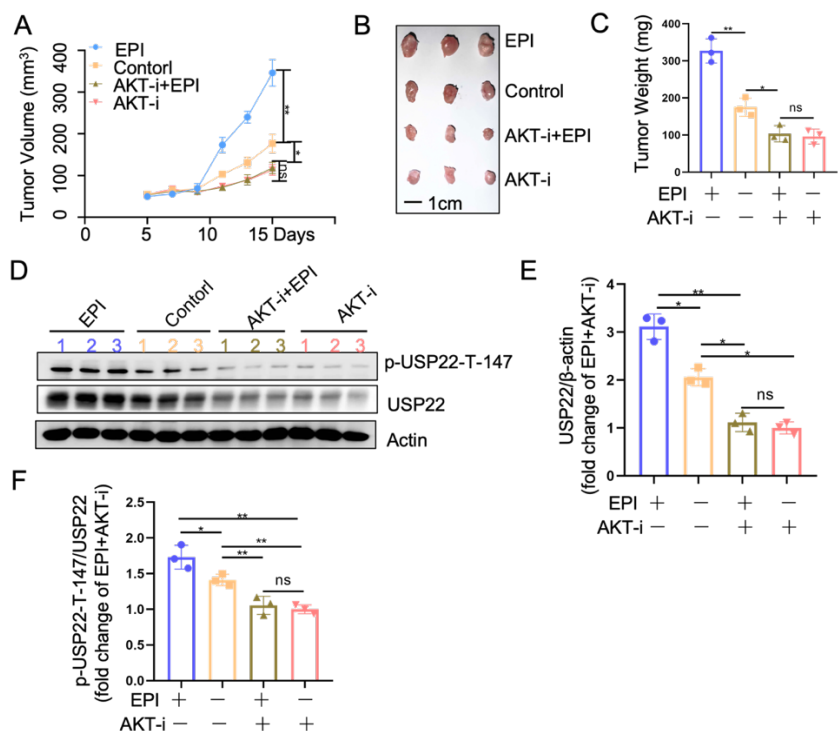

**Fig. s13. The effect of AKT inhibition on USP22 phosphorylation in tumors.** **(A-C)** Triple-negative

breast cancer 4T1 cells were injected into mammary fat pad of BALB/c mice (N=3 each group). Tumor volume (A), and tumor weight (B & C) were measured. (D) Analysis of USP22 and p-USP22-T-147 protein expression in tumor tissue from (B). (E-F) Quantitative analysis of USP22 and p-USP22-T-147 protein expression in the (D). Beta-actin used as a control to quantify the expression of USP22 (E). Quantification of phosphorylation is presented as ratios of signal intensities of phosphorylated protein (p-USP22-T-147) to total protein (USP22) (F). Statistical significance was determined by one-way ANOVA test or unpaired Student's *t* test. Data are expressed as mean  $\pm$  SD of three independent experiments. Statistical significance was concluded at \* $P < 0.05$ , \*\* $P < 0.01$ , \*\*\* $P < 0.001$ ; ns: no statistical significance.

**Figure s14**

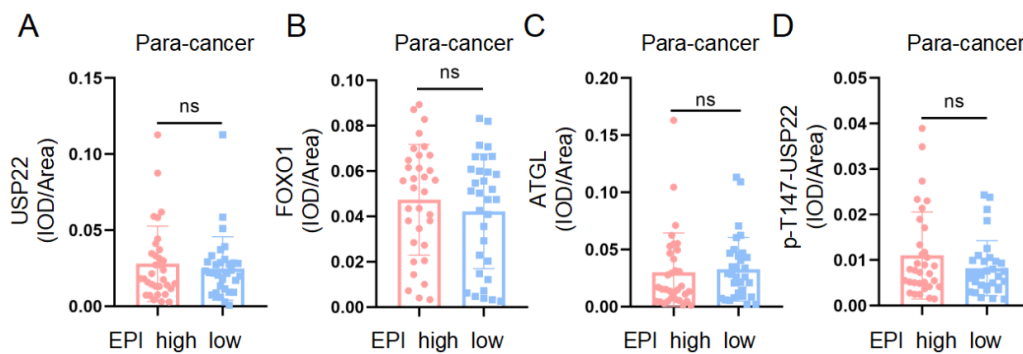

**Fig. s14:** (A) Analysis of USP22(A), FOXO1(B), ATGL(C), p-USP22-T147(D) expression of human para-breast cancer tissues in EPI<sup>high</sup> and EPI<sup>low</sup> patients (Epi<sup>low</sup>, n = 33; and Epi<sup>high</sup>, n = 32). Statistical significance was determined by unpaired Student's *t* test. Data are expressed as mean  $\pm$  SD. Statistical significance was concluded at \* $P < 0.05$ , \*\* $P < 0.01$ , \*\*\* $P < 0.001$ ; ns: no statistical significance.

**Figure s15**

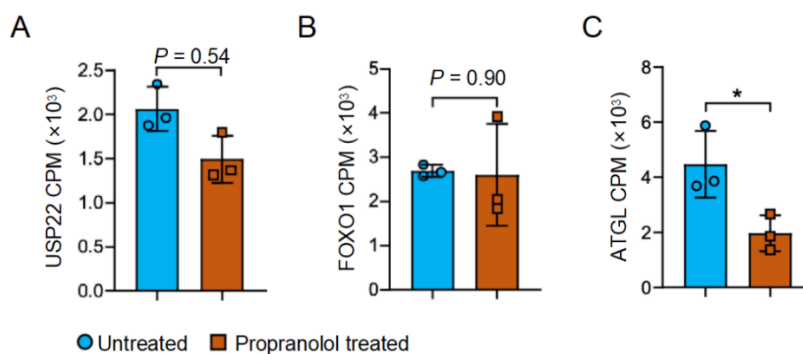

**Fig. s15:** Analysis of *Usp22* (A), *Foxo1* (B) and *Atgl* (C) expressions of GSM5740291. The data set was from three repeated RNA-seq analysis of the human medulloblastoma ONS-76 cells treated with propranolol or control PBS. CPM: counts per million cells. Unpaired Students *t* test was used for statistical analysis, \*  $p < 0.05$ .



**Figure s16.**

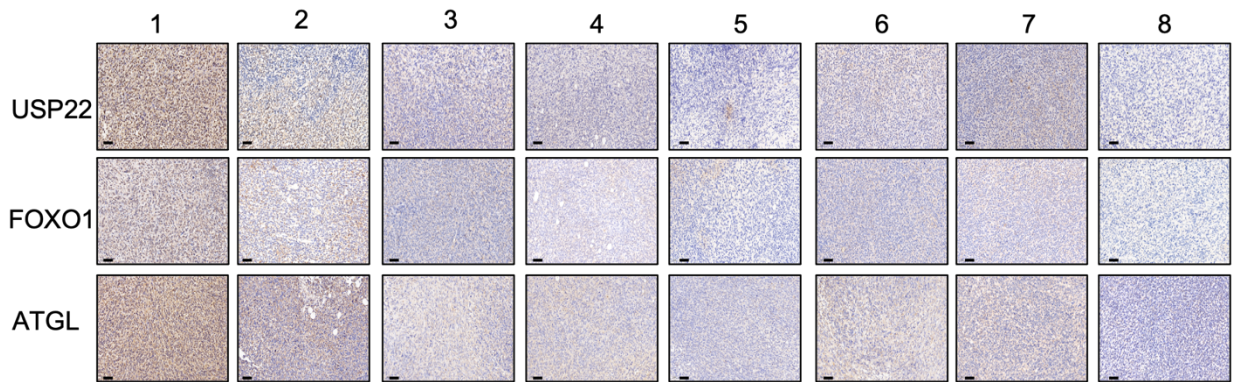

**Fig. s16:** Representative immunohistochemistry photomicrographs of tissues stained with USP22, FOXO1, ATGL from the tumor in the Fig. 7A, scale bar: 50  $\mu$ m.

**Supplementary Table 1** Association of plasma epinephrine level with clinical and pathological characteristics of breast cancer patients

| Variable    | All case N (%) | Patient # Plasma EPI Low & High |      | P <sup>A</sup> |
|-------------|----------------|---------------------------------|------|----------------|
|             |                | Low                             | High |                |
| HER2        |                |                                 |      | 0.321          |
| —           | 52 (80)        | 28                              | 24   |                |
| +           | 13 (20)        | 5                               | 8    |                |
| PR          |                |                                 |      | 0.812          |
| —           | 15 (23)        | 8                               | 7    |                |
| +           | 50 (77)        | 25                              | 25   |                |
| ER          |                |                                 |      | 0.294          |
| —           | 11 (16.9)      | 4                               | 7    |                |
| +           | 54 (83.1)      | 29                              | 25   |                |
| Tumor Stage |                |                                 |      | 0.426          |
| 0           | 1 (1.55)       | 0                               | 1    |                |
| 1           | 27 (41.5)      | 13                              | 14   |                |
| 2           | 31 (47.7)      | 16                              | 15   |                |
| 3           | 5 (7.7)        | 4                               | 1    |                |
| 4           | 1 (1.55)       | 0                               | 1    |                |

<sup>A</sup>  $\chi^2$  test; n = 65. ER+: ER  $\geq$  + and  $\geq$  1% ; ER-: ER < 1%; PR+: PR  $\geq$  + and  $\geq$  1%; PR-: PR < 1%; HER2+: HER2 3+ or HER2 2+ and FISH +; HER2-: HER2 0 or 1+ or HER2 2+.

**Supplementary Table 2. gRNAs used for USP22 KO in mouse and human breast cancer cells.**

| Sample                | sg-RNA Sequence                      |
|-----------------------|--------------------------------------|
| sgRNA for human USP22 | sgRNA-A1:<br>TTCAAAGCAGCCAATACTCCAGG |
|                       | sgRNA-A2:<br>GATGCGAGCCCTTCGTGTTGAGG |
| sgRNA for mouse USP22 | sgRNA-A1:<br>GTTGTCCGCATTAACAATGCTGG |
|                       | sgRNA-A2:<br>AGATGTGGACGGTGCACGCGAGG |

**Supplementary Table 3: PCR primers for USP22 analysis.**

| Primer for PCR                 | Sequence                                  |
|--------------------------------|-------------------------------------------|
| Primer for exon of human USP22 | For: 5' - CCCCTGTA CTTAAGGTAAGAGTAGC - 3' |
|                                | Rev: 5' - TAGCATGCACTGAGGTTGGG - 3'       |
| Primer for exon of mouse USP22 | For: 5'-ATTCCTTCATTCCCAGGGCG-3'           |
|                                | Rev: 5'-CAGGGATCATGTCCGGGAAGT-3'          |

**Supplementary Table 4: Primers used for ChIP-qPCR analysis.**

| Primer for ChIP               | sg-RNA Sequence                                                         |
|-------------------------------|-------------------------------------------------------------------------|
| Primer for promoter of PNPLA2 | For 5'- TTCATGGGTTGAGGGTGCTTC- 3'<br>Rev: 5'- ACATCACTCCCTCATGGCAG - 3' |

**Supplementary Table 5. Abs used for the study.**

| Antibodies reagent       | Source                    | Catalog    |
|--------------------------|---------------------------|------------|
| FOXO1                    | Cell Signaling Technology | 2880       |
| USP22                    | Abcam                     | ab195289   |
| pan-AKT                  | Proteintech               | 60203-2-Ig |
| p-AKT-473                | Cell Signaling Technology | 4051       |
| Phospho-USP22(thr147)    | Invitrogen                | PA5-105351 |
| Phosphoserine/threonine  | Invitrogen                | MA5-38234  |
| ATGL                     | Absin                     | abs137233  |
| HA-tag                   | Cell Signaling Technology | 3724S      |
| His-tag                  | Cell Signaling Technology | 12698S     |
| Flag-HRP                 | Sigma                     | A8592      |
| Flag                     | Sigma                     | F-1804     |
| HA-tag                   | Santa-cruze               | sc-7392    |
| myc-tag                  | Cell Signaling Technology | 2276S      |
| myc-HRP                  | Cell Signaling Technology | 2040S      |
| $\beta$ -actin           | Proteintech               | 66009-1-Ig |
| GAPDH                    | Proteintech               | 10494-1-AP |
| anti-rabbit IgG antibody | Cell Signaling Technology | 7074S      |
| anti-mouse IgG antibody  | Cell Signaling Technology | 7076S      |

**Supplementary Table 6. Primers for real-time RT-PCR analysis.**

| Primer name (RT-qPCR) | Sequence(5'-3')       |
|-----------------------|-----------------------|
| human-ATGL-F          | CCATCACAGTGTCCCCCTTC  |
| human -ATGL-R         | AACTGGATGCTGGTGTGGT   |
| human -USP22-F        | CTGGGACATCAGCTTGGATCT |
| human -USP22-R        | CTTTCCCCGTTTACCACGTTG |
| human -FOXO1-F        | TTCACCCAGCCCAAACCTACC |
| human -FOXO1-R        | GAGTCCAGGCGCACAGTTAT  |
| human -ACTB-F         | GGGAAATCGTGCGTGACATT  |
| human -ACTB-R         | GGAACCGCTCATTGCCAAT   |
